# Supplementary material
Source: PubMed Central journal article supplement (PMC6439678)
Supplement: jama-e1820578-s002.pdf [file jama-e1820578-s002.pdf]

## Supplementary Online Content

Zheng SL, Roddick AJ. Association of aspirin use for primary prevention with cardiovascular events and bleeding events: a systematic review and meta-analysis. *JAMA*. doi:10.1001/jama.2018.20578

**eMethods 1:** Search strategy

**eMethods 2:** Detailed statistical methods

**eMethods 3:** Deviance information criterion and model selection

**eTable 1:** Outcome definitions

**eTable 2:** Risk of bias assessment

**eTable 3:** Absolute risk differences and numbers needed to treat

**eTable 4:** Total stroke outcomes

**eTable 5:** Event rates for efficacy and safety outcomes

**eTable 6:** Sensitivity analyses

**eFigure 1:** Study flow chart

**eFigure 2:** Risk of bias summary

**eFigure 3:** Funnel plot for primary cardiovascular outcome

**eFigure 4:** Frequentist analysis forest plots

This supplementary material has been provided by the authors to give readers additional information about their work.

## **eMethods 1: Search strategy**

A systematic review on the efficacy of aspirin for the primary prevention of cardiovascular events was undertaken by the U.S. Preventive Services Task Force was published in 2016. The search included all relevant studies published prior to January 2015.

Therefore the search strategy for this systematic review was conducted to update the previous meta-analysis.

Studies were searched through November 1, 2018.

Search terms were as follows:

Aspirin or Acetylsalicylic acid (t/ab)

AND

Cardiovascular or mortality or myocardial infarction or stroke (t/ab)

AND

Primary prevention (t/ab)

The search was conducted through the Cochrane Central Register of Controlled Trials register, which includes articles indexed on Pubmed and Embase.

## **eMethods 2: Detailed statistical methods**

### **Estimated trial 10-year cardiovascular risk**

In order to investigate the effects of aspirin on cardiovascular and bleeding outcomes in populations across the range of cardiovascular risk, we estimated the cardiovascular risk in individual trials. The primary outcome (cardiovascular mortality, non-fatal MI and non-fatal stroke) was taken as the major cardiovascular event for which risk was calculated. For each trial, the risk of the primary outcome in the group taking no aspirin was calculated, before being divided by the mean follow-up time (in years) to give the annualised event rate. This was then multiplied by ten to give the 10-year estimated event rate. Confidence intervals were estimated by assuming that events were distributed according to a Poisson distribution.

### **Bayesian Meta-analysis**

For the primary meta-analysis, a Bayesian approach was undertaken using the *gemtc* package<sup>1</sup> in R (version 3.4.1)<sup>2</sup> and JAGS (version 4.3.0)<sup>3</sup>.

For the frequentist meta-analysis the *meta* package was used<sup>4</sup>.

Natural logarithms of reported hazard ratios and corresponding standard errors were extracted from studies where available. The number of events and duration of follow-up (in person-years) were extracted from all other studies, allowing for studies with different lengths of follow-up to be incorporated into the analysis on the hazard ratio scale. This assumes that events occurred at a constant rate during each of these trials.

Fixed- and random-effects models were generated for each outcome using Poisson likelihood and log link using non-informative vague priors<sup>5</sup>. A Markov Chain Monte Carlo (MCMC) approach was used with 5000 adaptation iterations followed by 100,000 iterations of 4 chains. The potential scale reduction factor (PSRF) was used to assess chain convergence, using a cut-off of 1.05<sup>6</sup>.

Heterogeneity was assessed using the  $I^2$  statistic. An  $I^2$  of <25% was considered to represent low heterogeneity, 25-50% moderate heterogeneity, and >50% high heterogeneity.

The Deviance Information Criterion was used to select fixed- or random-effects meta-analysis for each outcome, as has been utilized previously<sup>7</sup>. A difference of greater than 3 units was considered important, and the model with the lowest DIC was used for analysis<sup>8</sup>. Where the DIC was similar between models (within 3 units), model selection was achieved based on heterogeneity in the fixed-effect model, with a random-effects model favored if  $I^2 > 25\%$ .

For the Bayesian meta-analysis 95% credible intervals (CrI) were calculated, and 95% CrI that exclude 1 were treated as statistically significant.

### **Absolute risk difference (ARD)**

For each outcome, the absolute risk in the 'no aspirin' population was calculated as the number of events divided by the total number of participants.

The relative risk and 95% confidence intervals (CI) for each outcome were estimated by random-effects frequentist pairwise meta-analysis using the Mantel-Haenzel method. The relative risk and baseline absolute risk were used to calculate the absolute risk difference with corresponding 95% CI. Negative values indicate a reduction in risk with aspirin treatment and positive values indicate an increased risk.

Numbers needed to treat or harm were calculated for all outcomes with a statistically significant reduction or increase in risk.

### **Cancer outcomes**

Incident cancer (defined as new cancer diagnosis) and cancer mortality were additional exploratory endpoints. Data was extracted on cancer outcomes from studies identified in the primary literature search. Additional related publications providing information on cancer outcomes from included studies were searched on PubMed using the trial name, first or senior author, and the term "cancer". Meta-analyses (both using trial level and individual patient data) were identified, with data extracted from them if they could not be identified from trial publications.

### eMethods 3: Deviance information criterion and model selection

| <b>All patients</b>       |              | <b>DIC</b>    |                                       |              |  |
|---------------------------|--------------|---------------|---------------------------------------|--------------|--|
| <b>Efficacy</b>           | <b>Fixed</b> | <b>Random</b> | <b><math>P</math> (%)<sup>*</sup></b> | <b>Model</b> |  |
| Composite outcome         | 19.38        | 21.24         | 0                                     | fixed        |  |
| All-cause mortality       | 14.28        | 16.27         | 0                                     | fixed        |  |
| Cardiovascular mortality  | 24.56        | 26.53         | 0                                     | fixed        |  |
| All myocardial infarction | 48.96        | 38.72         | 42                                    | random       |  |
| Total stroke              | 30.13        | 31.30         | 1                                     | fixed        |  |
| Ischemic stroke           | 25.81        | 25.72         | 18                                    | fixed        |  |
| <b>Safety</b>             |              |               |                                       |              |  |
| Major Bleeding            | 27.17        | 28.48         | 0                                     | fixed        |  |
| Intracranial Bleeding     | 25.40        | 27.24         | 0                                     | fixed        |  |
| Major GI Bleeding         | 28.46        | 29.74         | 0                                     | fixed        |  |
| <b>Cancer</b>             |              |               |                                       |              |  |
| Incident Cancer           | 27.06        | 27.93         | 25                                    | random       |  |
| Cancer Mortality          | 29.66        | 29.25         | 17                                    | fixed        |  |
| <b>Low risk</b>           |              |               |                                       |              |  |
| <b>Efficacy</b>           | <b>Fixed</b> | <b>Random</b> | <b><math>P</math> (%)<sup>*</sup></b> | <b>Model</b> |  |
| Composite outcome         | 8.04         | 9.81          | 0                                     | fixed        |  |
| All-cause mortality       | 7.47         | 8.93          | 0                                     | fixed        |  |
| Cardiovascular mortality  | 9.15         | 10.55         | 0                                     | fixed        |  |
| All myocardial infarction | 15.68        | 14.81         | 32                                    | random       |  |
| Total stroke              | 17.22        | 16.97         | 26                                    | random       |  |
| Ischemic stroke           | 14.45        | 13.75         | 33                                    | random       |  |
| <b>Safety</b>             |              |               |                                       |              |  |
| Major Bleeding            | 11.88        | 13.46         | 11                                    | fixed        |  |
| Intracranial Bleeding     | 11.45        | 13.00         | 0                                     | fixed        |  |
| Major GI Bleeding         | 13.81        | 15.15         | 9                                     | fixed        |  |
| <b>Cancer</b>             |              |               |                                       |              |  |
| Incident Cancer           | 11.45        | 11.03         | 41                                    | random       |  |
| Cancer Mortality          | 13.30        | 11.53         | 42                                    | random       |  |
| <b>High risk</b>          |              |               |                                       |              |  |
| <b>Efficacy</b>           | <b>Fixed</b> | <b>Random</b> | <b><math>P</math> (%)<sup>*</sup></b> | <b>Model</b> |  |
| Composite outcome         | 12.71        | 14.05         | 0                                     | fixed        |  |

Formatted Table

**eMethods 3: Deviance information criterion and model selection (Continued)**

| High risk       | Efficacy                  | DIC   |        |                 | Model  |
|-----------------|---------------------------|-------|--------|-----------------|--------|
|                 |                           | Fixed | Random | $\hat{P}$ (%) * |        |
|                 | All-cause mortality       | 8.79  | 10.02  | 0               | fixed  |
|                 | Cardiovascular mortality  | 16.69 | 18.68  | 14              | fixed  |
|                 | All myocardial infarction | 26.93 | 26.03  | 26              | random |
|                 | Total stroke              | 18.33 | 19.38  | 11              | fixed  |
|                 | Ischemic stroke           | 16.93 | 18.25  | 8               | fixed  |
|                 | <b>Safety</b>             |       |        |                 |        |
|                 | Major Bleeding            | 17.14 | 17.39  | 10              | fixed  |
|                 | Intracranial Bleeding     | 15.05 | 16.28  | 0               | fixed  |
|                 | Major GI Bleeding         | 16.61 | 16.80  | 15              | fixed  |
|                 | <b>Cancer</b>             |       |        |                 |        |
|                 | Incident Cancer           | 14.23 | 15.52  | 3               | fixed  |
|                 | Cancer Mortality          | 14.74 | 16.33  | 0               | fixed  |
| <b>Diabetes</b> | <b>Efficacy</b>           |       |        |                 |        |
|                 | Composite outcome         | 12.47 | 14.06  | 0               | fixed  |
|                 | All-cause mortality       | 7.50  | 8.74   | 0               | fixed  |
|                 | Cardiovascular mortality  | 10.15 | 10.34  | 51              | random |
|                 | All myocardial infarction | 26.40 | 27.29  | 13              | fixed  |
|                 | Total stroke              | 20.79 | 21.49  | 13              | fixed  |
|                 | Ischemic stroke           | 8.65  | 6.41   | 77              | random |
|                 | <b>Safety</b>             |       |        |                 |        |
|                 | Major Bleeding            | 6.06  | 7.02   | 0               | fixed  |
|                 | Intracranial Bleeding     | 6.03  | 6.20   | 1               | fixed  |
|                 | Major GI Bleeding         | 6.06  | 6.25   | 1               | fixed  |
|                 | <b>Cancer</b>             |       |        |                 |        |
|                 | Incident Cancer           | 6.55  | 6.98   | 34              | random |
|                 | Cancer Mortality          | 8.57  | 8.90   | 39              | random |

\* $\hat{P}$  values obtained from the fixed-effect model.

Formatted Table

**eTable 1: Outcome definitions**

| Trial                                                       | Primary                                                                                                                 | ACM       | CVM                                                                                                                                                          | MI                                                                                                                                                                                                                                     | All strokes                                              | Ischemic strokes                                                           | Major bleeding                  | Intracranial bleeding           | GI bleeding                     |
|-------------------------------------------------------------|-------------------------------------------------------------------------------------------------------------------------|-----------|--------------------------------------------------------------------------------------------------------------------------------------------------------------|----------------------------------------------------------------------------------------------------------------------------------------------------------------------------------------------------------------------------------------|----------------------------------------------------------|----------------------------------------------------------------------------|---------------------------------|---------------------------------|---------------------------------|
| <b>British Doctors Study<sup>9</sup>, 1988</b>              | MI, stroke (ischemic, hemorrhagic, unknown), vascular death (including sudden death, pulmonary embolism and hemorrhage) | Any death | Not specified                                                                                                                                                | MI (Not specified)                                                                                                                                                                                                                     | Ischemic, hemorrhagic and unknown                        | Diagnosed by clinicians and without the use of CT scanning                 | ATT meta-analysis (Not defined) | ATT meta-analysis (Not defined) | ATT meta-analysis (Not defined) |
| <b>Physicians' Health Study<sup>10</sup>, 1989</b>          | CVM, MI and stroke (ischemic, hemorrhagic, unknown)                                                                     | Any death | Cardiovascular "mechanism" of death                                                                                                                          | WHO definition from 1971                                                                                                                                                                                                               | Ischemic, hemorrhagic and unknown (defined by ICD codes) | By neurologist's judgement                                                 | ATT meta-analysis (Not defined) | ATT meta-analysis (Not defined) | ATT meta-analysis (Not defined) |
| <b>Hypertension Optimal Treatment<sup>11</sup>, 1998</b>    | Fatal and non-fatal MI, fatal and non-fatal stroke (ischemic, hemorrhagic, unknown), 'all other cardiovascular deaths'  | Any death | Death occurring within 28 days of cardiovascular event with no obvious non-cardiovascular cause                                                              | Two of: central chest pain for >15 minutes, transient elevation of enzymes indicating myocardial damage, or typical electrocardiographic changes<br><br>New-onset Q or QS waves without clinical signs of MI were defined as silent MI | Ischemic, hemorrhagic or unknown                         | Not included in analysis – study does not specify aetiology                | ATT meta-analysis (Not defined) | ATT meta-analysis (Not defined) | ATT meta-analysis (Not defined) |
| <b>Thrombosis Prevention Trial (TPT)<sup>12</sup>, 1998</b> | Coronary death, all myocardial infarction, all stroke                                                                   | Any death | Not specified                                                                                                                                                | MI (Not Specified)                                                                                                                                                                                                                     | Ischemic, hemorrhagic or unknown                         | Ischemic based on imaging or necropsy findings                             | ATT meta-analysis (Not defined) | ATT meta-analysis (Not defined) | ATT meta-analysis (Not defined) |
| <b>Primary Prevention Project (PPP)<sup>13</sup>, 2001</b>  | CVM, MI and stroke (ischemic, hemorrhagic, unknown)                                                                     | Any death | Deaths within 28 days of cardiovascular event with no other evident cause, sudden death, death from heart failure, cardiovascular deaths as defined by ICD-9 | Two of: central chest pain of typical intensity and duration, transient elevation of enzymes indicating myocardial damage, or typical electrocardiographic changes                                                                     | Ischemic, hemorrhagic or unknown                         | Ischemic based on appropriate imaging or necropsy findings where available | ATT meta-analysis (Not defined) | ATT meta-analysis (Not defined) | ATT meta-analysis (Not defined) |

Formatted Table

**eTable 1: Outcome definitions (continued)**

| Trial                                                                                                     | Primary                                                                                        | ACM       | CVM                                                                                                                                                             | MI                                                                                                                   | All strokes                                                                   | Ischemic strokes                                                                                                      | Major bleeding                                                                                                                                                 | Intracranial bleeding                              | GI bleeding                                                                                    |
|-----------------------------------------------------------------------------------------------------------|------------------------------------------------------------------------------------------------|-----------|-----------------------------------------------------------------------------------------------------------------------------------------------------------------|----------------------------------------------------------------------------------------------------------------------|-------------------------------------------------------------------------------|-----------------------------------------------------------------------------------------------------------------------|----------------------------------------------------------------------------------------------------------------------------------------------------------------|----------------------------------------------------|------------------------------------------------------------------------------------------------|
| <b>Women's Health Study (WHS)<sup>14</sup>, 2005</b>                                                      | CVM, non-fatal MI, non-fatal stroke (ischemic or hemorrhagic)                                  | Any death | Confirmed cardiovascular cause based on autopsy reports, death certificates, medical records, and information obtained from next of kin or other family members | Symptoms meeting WHO criteria and associated with abnormal levels of cardiac enzymes or electrocardiographic changes | Ischemic or hemorrhagic                                                       | Ischemic based on CT or MRI findings                                                                                  | ATT meta-analysis (Not defined)                                                                                                                                | ATT meta-analysis (Not defined)                    | ATT meta-analysis (Not defined)                                                                |
| <b>Prevention of Arterial Disease and Diabetes (POPADAD)<sup>15</sup>, 2008</b>                           | Death from coronary heart disease or stroke, non-fatal myocardial infarction, non-fatal stroke | Any death | Death from coronary heart disease or stroke as per study definitions                                                                                            | MI According to WHO criteria                                                                                         | Stroke (WHO definition – presumed to include hemorrhagic and ischemic causes) | Not reported                                                                                                          | Not reported                                                                                                                                                   | Not reported                                       | Not specified                                                                                  |
| <b>Japanese Primary Prevention of Atherosclerosis with Aspirin for Diabetes (JPAD)<sup>16</sup>, 2008</b> | Fatal and nonfatal coronary heart disease, fatal and nonfatal cerebrovascular disease          | Any death | Death from ischemic stroke or MI                                                                                                                                | MI (Not specified)                                                                                                   | Stroke (ischemic, hemorrhagic)                                                | Ischemic stroke (Not specified)                                                                                       | Severe GI bleeding and hemorrhagic stroke                                                                                                                      | Hemorrhagic stroke (Not specified)                 | Major GI bleeding (Not specified)                                                              |
| <b>Aspirin for Asymptomatic Atherosclerosis (AAA)<sup>17</sup>, 2010</b>                                  | Fatal or nonfatal coronary event or stroke (ischemic, hemorrhagic, unknown)                    | Any death | Coronary or stroke (ischemic, hemorrhagic, unknown) death                                                                                                       | MI (Not specified)                                                                                                   | Stroke (ischemic, hemorrhagic, unknown)                                       | Ischemic stroke (Not specified)                                                                                       | Major hemorrhage (hemorrhagic stroke, subarachnoid hemorrhage), gastrointestinal or other requiring admission to hospital for intervention to control bleeding | Hemorrhagic stroke or subarachnoid hemorrhage      | Gastrointestinal bleeding requiring admission to hospital for intervention to control bleeding |
| <b>Japanese Primary Prevention Project (JPPP)<sup>18</sup>, 2014</b>                                      | CVM, non-fatal MI, non-fatal stroke (ischemic, hemorrhagic)                                    | Any death | Not specified                                                                                                                                                   | MI (ESC/ACC Definition)                                                                                              | Ischemic or hemorrhagic (including subarachnoid)                              | Imaging evidence of cerebral infarction accompanied by an acute regional neurological deficit maintained for 24 hours | Serious extracranial hemorrhage requiring hospitalization or transfusion, and intracranial hemorrhage                                                          | Intracranial hemorrhage or subarachnoid hemorrhage | Not included in analysis – Not specified                                                       |

Formatted Table



**eTable 1: Outcome definitions (continued)**

| Trial                                                                                | Primary                                                                                                                                                                 | ACM       | CVM                                         | MI                      | All strokes                                                             | Ischemic strokes                | Major bleeding                                                                                                                                                                       | Intracranial bleeding                                                          | GI bleeding                           |
|--------------------------------------------------------------------------------------|-------------------------------------------------------------------------------------------------------------------------------------------------------------------------|-----------|---------------------------------------------|-------------------------|-------------------------------------------------------------------------|---------------------------------|--------------------------------------------------------------------------------------------------------------------------------------------------------------------------------------|--------------------------------------------------------------------------------|---------------------------------------|
| <b>A Study of Cardiovascular Events in Diabetes (ASCEND)<sup>19</sup>, 2018</b>      | Non-fatal MI, non-fatal stroke (ischemic only) or TIA, vascular death                                                                                                   | Any death | Vascular death excluding hemorrhagic stroke | MI                      | <b>Not included in analysis – only reports ischemic stroke</b>          | Ischemic stroke                 |                                                                                                                                                                                      |                                                                                |                                       |
| <b>Aspirin to Reduce Risk of Initial Vascular Events (ARRIVE)<sup>20</sup>, 2018</b> | Cardiovascular death, non-fatal MI and non-fatal stroke (ischemic, hemorrhagic, unknown)                                                                                | Any death | Cardiovascular death (not specified)        | MI (not specified)      | Ischemic, hemorrhagic or unknown                                        | Ischemic stroke (not specified) | Major according to GUSTO criteria                                                                                                                                                    | Hemorrhagic stroke                                                             | Severe gastrointestinal bleed         |
| <b>Aspirin in Reducing Events in the Elderly (ASPREE)<sup>21</sup>, 2018</b>         | Coronary heart disease death, non-fatal MI (ESC and ACC definitions), fatal and non-fatal stroke (ischemic, hemorrhagic, uncertain and subarachnoid hemorrhage strokes) | Any death | Death from stroke or coronary heart disease | MI (ESC/ACC definition) | Ischemic, hemorrhagic and uncertain causes, and subarachnoid hemorrhage | Ischemic stroke                 | Hemorrhagic stroke and non-stroke clinically significant bleeding (requiring transfusion, hospitalisation for >24h, prolonged hospitalisation by >24h with bleeding, fatal bleeding) | Hemorrhagic stroke, subdural or extradural hemorrhage, subarachnoid hemorrhage | Upper or lower gastrointestinal bleed |

Formatted Table

**eTable 2: Risk of Bias Assessment**

| Trial                                                       | Sequence generation                                | Allocation concealment                                                                                                               | Blinding                                                                                                                                           | Detection bias                                                                                                                                                                                                                                                                            | Attrition bias                                                                                                      | Reporting bias                                               | Overall Risk of Bias |
|-------------------------------------------------------------|----------------------------------------------------|--------------------------------------------------------------------------------------------------------------------------------------|----------------------------------------------------------------------------------------------------------------------------------------------------|-------------------------------------------------------------------------------------------------------------------------------------------------------------------------------------------------------------------------------------------------------------------------------------------|---------------------------------------------------------------------------------------------------------------------|--------------------------------------------------------------|----------------------|
| <b>British Doctors' Study<sup>9</sup>, 1988</b>             | Low<br>"Randomly allocated by computer"            | Unclear<br>Not reported                                                                                                              | High<br>"Placebo tablets were not used, so that treatment was not blind."                                                                          | Unclear<br>"All participating doctors were asked to complete a brief questionnaire ... about their health and their use of aspirin..."                                                                                                                                                    | Low<br>"Data on mortality were thought to be complete and data on morbidity virtually complete."                    | Low<br>ROB assessors found no concerns on reporting quality. | High                 |
| <b>Physicians' Health Study<sup>10</sup>, 1989</b>          | Low<br>"randomly assigned"                         | Unclear<br>Not reported                                                                                                              | Low<br>"assigned at random to receive aspirin ... and to receive aspirin placebo."                                                                 | Unclear<br>"They were also sent brief questionnaires asking about... the occurrence of any relevant events."                                                                                                                                                                              | Low<br>"99.7% were still providing information on morbidity, and the vital status of all 22,071 doctors was known." | Low<br>ROB assessors found no concerns on reporting quality. | Low                  |
| <b>Hypertension Optimal Treatment<sup>11</sup>, 1998</b>    | Low<br>"randomly assigned"                         | Low<br>"randomisation was computer-generated based on communications by fax between investigators and the Study Coordinating Centre" | Low<br>"Patients were randomised in a double-blind way, to a low dose, 75 mg daily, of acetylsalicylic acid or identical-looking placebo tablets." | Unclear<br>"A classification of all reported events was made by the Independent Clinical Event Committee based on all available information... All events were classified without any knowledge of the actual medication or the treatment group to which the patients had been assigned." | Low<br>"A total of 2.6% patients were lost to follow-up."                                                           | Low<br>ROB assessors found no concerns on reporting quality. | Low                  |
| <b>Thrombosis Prevention Trial (TPT)<sup>12</sup>, 1998</b> | Low<br>"Allocation to treatment was done randomly" | Low<br>"computer-generated random numbers balanced between the four treatment groups"                                                | Low<br>"Treatment was double-blind"                                                                                                                | Low<br>"reviewed by their general practitioners each year ... in addition to which the research nurse annually searched all the notes ... for possible end-points"                                                                                                                        | Low<br>"The number for whom no information on possible non-fatal events was available was 1.1%."                    | Low<br>ROB assessors found no concerns on reporting quality. | Low                  |

Formatted Table

**eTable 2: Risk of Bias Assessment (continued)**

| Trial                                                                           | Sequence generation                                                      | Allocation concealment                                                                                                      | Blinding                                                                        | Detection bias                                                                                                                                                                                                                                                                                                                                                             | Attrition bias                                                                                                                         | Reporting bias                                               | Overall Risk of Bias |
|---------------------------------------------------------------------------------|--------------------------------------------------------------------------|-----------------------------------------------------------------------------------------------------------------------------|---------------------------------------------------------------------------------|----------------------------------------------------------------------------------------------------------------------------------------------------------------------------------------------------------------------------------------------------------------------------------------------------------------------------------------------------------------------------|----------------------------------------------------------------------------------------------------------------------------------------|--------------------------------------------------------------|----------------------|
| <b>Primary Prevention Project (PPP)<sup>13</sup>, 2001</b>                      | Low<br>"Randomly allocated"                                              | Low<br>"Centrally assigned ... with a computer-generated randomisation table ... in random permuted blocks"                 | High<br>"Patients were randomly allocated to receive aspirin ... or no aspirin" | Low<br>"Follow-up clinical visits were scheduled yearly and included re-assessment of ... outcome events."                                                                                                                                                                                                                                                                 | Low<br>"At the end of the study 92.3% patients had clinical follow-up."                                                                | Low<br>ROB assessors found no concerns on reporting quality. | High                 |
| <b>Women's Health Study (WHS)<sup>14</sup>, 2005</b>                            | Low<br>"randomized, double-blind, placebo-controlled trial"              | Unclear<br>Not reported                                                                                                     | Low<br>"assigned to receive aspirin and ... to receive placebo"                 | Unclear<br>"Every 12 months, ... sent ... questionnaires on compliance, side effects, the occurrence of relevant clinical end points... Study ... end-point ascertainment were continued in a blinded fashion through the scheduled end of the trial... Medical records were obtained ... and were reviewed in a blinded fashion by an end-points committee of physicians" | Low<br>"Rates of follow-up with respect to morbidity and mortality were 97.2 percent complete and 99.4 percent complete, respectively" | Low<br>ROB assessors found no concerns on reporting quality. | Low                  |
| <b>Prevention of Arterial Disease and Diabetes (POPADAD)<sup>15</sup>, 2008</b> | Low<br>"patients were randomly assigned to one of four treatment groups" | Low<br>"allocation sequence used randomised permuted blocks of eight and was computer generated by the trial statisticians" | Low<br>"interventions were daily aspirin 100 mg or placebo tablet"              | Low<br>"Follow-up evaluations were done every six months. At these visits we recorded outcome events, adverse events, and interventions"                                                                                                                                                                                                                                   | Low<br>"Overall, 1074 (of 1276) participants had their final follow-up in 2006"                                                        | Low<br>ROB assessors found no concerns on reporting quality. | Low                  |

Formatted Table

**eTable 2: Risk of Bias Assessment (continued)**

| Trial                                                                                                     | Sequence generation                                                                            | Allocation concealment                                                                                                                                                                                                          | Blinding                                                                                       | Detection bias                                                                                                                                                                                                                                                                              | Attrition bias                                                                                                                      | Reporting bias                                        | Overall Risk of Bias |
|-----------------------------------------------------------------------------------------------------------|------------------------------------------------------------------------------------------------|---------------------------------------------------------------------------------------------------------------------------------------------------------------------------------------------------------------------------------|------------------------------------------------------------------------------------------------|---------------------------------------------------------------------------------------------------------------------------------------------------------------------------------------------------------------------------------------------------------------------------------------------|-------------------------------------------------------------------------------------------------------------------------------------|-------------------------------------------------------|----------------------|
| <b>Japanese Primary Prevention of Atherosclerosis with Aspirin for Diabetes (JPAD)<sup>16</sup>, 2008</b> | Low                                                                                            | Low                                                                                                                                                                                                                             | High                                                                                           | Low                                                                                                                                                                                                                                                                                         | Low                                                                                                                                 | Low                                                   | High                 |
|                                                                                                           | "Enrolled patients were randomly assigned to the aspirin group or the non aspirin group."      | "The randomization was performed as non stratified randomization from a random number table. The study center prepared the sealed envelopes with random assignments and distributed them by mail"                               | "prospective, randomized, open-label, controlled trial"                                        | "Follow-up visits were scheduled every 2 weeks for patients seen in a clinic setting and every 4 weeks for patients seen in a hospital setting."                                                                                                                                            | "A total of 193 patients (of 2539) were lost to follow-up, and data for those patients were censored at the day of last follow-up." | ROB assessors found no concerns on reporting quality. |                      |
| <b>Aspirin for Asymptomatic Atherosclerosis (AAA)<sup>17</sup>, 2010</b>                                  | Low                                                                                            | Low                                                                                                                                                                                                                             | Low                                                                                            | Low                                                                                                                                                                                                                                                                                         | Low                                                                                                                                 | Low                                                   | Low                  |
|                                                                                                           | "double blind, randomized controlled trial of once daily low-dose aspirin (100 mg) vs placebo" | "Consecutive participant study numbers were assigned to aspirin or placebo with permuted blocks of size 8, which varied randomly. A staff member not involved in the study produced the computer generated randomization list." | "double blind, randomized controlled trial of once daily low-dose aspirin (100 mg) vs placebo" | "Ascertainment of possible events was sought annually from participant follow-up, a study reply card attached to general practitioner notes, flagging for death at the NHS Central Registry, and linkage to databases of deaths and hospital discharges at NHS National Services Scotland." | "Ten participants (0.3%) were censored because they either emigrated or could not be contacted."                                    | ROB assessors found no concerns on reporting quality. |                      |

Formatted Table

**eTable 2: Risk of Bias Assessment (continued)**

| Trial                                                                           | Sequence generation                                                     | Allocation concealment                                                                                | Blinding                                                                                                                     | Detection bias                                                                                                                                                                                                                                                                                                                                                                                                     | Attrition bias                                                                                                                                                     | Reporting bias                                        | Overall Risk of Bias |
|---------------------------------------------------------------------------------|-------------------------------------------------------------------------|-------------------------------------------------------------------------------------------------------|------------------------------------------------------------------------------------------------------------------------------|--------------------------------------------------------------------------------------------------------------------------------------------------------------------------------------------------------------------------------------------------------------------------------------------------------------------------------------------------------------------------------------------------------------------|--------------------------------------------------------------------------------------------------------------------------------------------------------------------|-------------------------------------------------------|----------------------|
| Japanese Primary Prevention Project (JPPP) <sup>18</sup> , 2014                 | Low                                                                     | Low                                                                                                   | High                                                                                                                         | Low                                                                                                                                                                                                                                                                                                                                                                                                                | Low                                                                                                                                                                | Low                                                   | High                 |
|                                                                                 | "Pseudorandom numbers were generated using the Mersenne Twister method" | "The study statistician generated the random allocation sequence using a central computerized system" | "randomized, open-label, parallel-group clinical trial"                                                                      | "the following Variables were evaluated in the clinic when patients met with the study physician: disease outcomes, adverse events..."                                                                                                                                                                                                                                                                             | "For analyses of the primary and secondary endpoints, 194 patients (1.3%) were excluded from the randomized population owing to protocol violations or deviations" | ROB assessors found no concerns on reporting quality. |                      |
| A Study of Cardiovascular Events in Diabetes (ASCEND) <sup>19</sup> , 2018      | Low                                                                     | Low                                                                                                   | Low                                                                                                                          | Unclear                                                                                                                                                                                                                                                                                                                                                                                                            | Low                                                                                                                                                                | Low                                                   | Low                  |
|                                                                                 | "randomized trial"                                                      | "Using minimized randomization"                                                                       | "participants to receive 100 mg of aspirin once daily or a matching placebo tablet"                                          | "we sent follow-up questionnaires ... to participants every 6 months until the end of the trial. In these questionnaires, we sought information regarding all serious adverse events (including potential trial outcomes)... nonserious adverse events resulting in discontinuation of the trial regimen, and any symptomatic bleeding episodes"<br><br>"Confirmation and further information was sought from GPs" | "complete follow-up data were available for 15,341 participants (99.1%)"                                                                                           | ROB assessors found no concerns on reporting quality. |                      |
| Aspirin to Reduce Risk of Initial Vascular Events (ARRIVE) <sup>20</sup> , 2018 | Low                                                                     | Low                                                                                                   | Low                                                                                                                          | Low                                                                                                                                                                                                                                                                                                                                                                                                                | Low                                                                                                                                                                | Low                                                   | Low                  |
|                                                                                 | "Randomly assigned"                                                     | "computer-generated randomisation code"                                                               | "Patients, investigators and their staff, the sponsor, and others involved in treating the patients or data collection were" | "Patients, investigators and their staff, the sponsor, and others involved in treating the patients or data collection were"                                                                                                                                                                                                                                                                                       | "Over the course of the study ...29.6% of patients terminated the study prematurely (29.4% in the aspirin"                                                         | ROB assessors found no concerns on reporting quality. |                      |

Formatted Table

using balanced permuted blocks"    masked to the identity of the treatment."    masked to the identity of the treatment."    group and 29.9% in the placebo group)."

**eTable 2: Risk of Bias Assessment (continued)**

| Trial                                                                        | Sequence generation        | Allocation concealment                                                  | Blinding                                                                                                                                 | Detection bias                                                                                                                                              | Attrition bias                                                                                                                                   | Reporting bias                                               | Overall Risk of Bias |
|------------------------------------------------------------------------------|----------------------------|-------------------------------------------------------------------------|------------------------------------------------------------------------------------------------------------------------------------------|-------------------------------------------------------------------------------------------------------------------------------------------------------------|--------------------------------------------------------------------------------------------------------------------------------------------------|--------------------------------------------------------------|----------------------|
| <b>Aspirin in Reducing Events in the Elderly (ASPREE)<sup>21</sup>, 2018</b> | Low<br>"randomly assigned" | Low<br>"Randomization was stratified according to trial center and age" | Low<br>"Trial participants, investigators, and general practitioner associate investigators were unaware of the trial-group assignments" | Low<br>"Committees whose members were unaware of the trial-group assignments were responsible for adjudication of all potential clinical end-point events." | Low<br>"1.5% of the participants in the aspirin group and 1.6% of those in the placebo group had been lost to follow-up by the end of the trial" | Low<br>ROB assessors found no concerns on reporting quality. | Low                  |

Formatted Table

**eTable 3: Absolute risk differences and numbers needed to treat**

| Efficacy                  | All patients           |     | Low Risk               |     | High Risk              |     | Diabetes               |     |
|---------------------------|------------------------|-----|------------------------|-----|------------------------|-----|------------------------|-----|
|                           | ARD                    | NNT | ARD                    | NNT | ARD                    | NNT | ARD                    | NNT |
| Composite outcome         | -0.41 (-0.59 to -0.23) | 242 | -0.34 (-0.52 to -0.14) | 297 | -0.63 (-1.04 to -0.18) | 160 | -0.65 (-1.17 to -0.09) | 153 |
| All-cause mortality       | -0.13 (-0.32 to 0.07)  |     | -0.01 (-0.27 to 0.27)  |     | -0.43 (-0.84 to 0.02)  |     | -0.24 (-0.91 to 0.49)  |     |
| Cardiovascular mortality  | -0.07 (-0.17 to 0.04)  |     | -0.07 (-0.16 to 0.03)  |     | -0.04 (-0.32 to 0.27)  |     | -0.05 (-0.94 to 1.27)  |     |
| All myocardial infarction | -0.28 (-0.47 to -0.05) | 361 | -0.27 (-0.49 to 0.00)  | 366 | -0.32 (-0.74 to 0.16)  |     | -0.26 (-0.88 to 0.47)  |     |
| All stroke                | -0.09 (-0.20 to 0.04)  |     | -0.04 (-0.21 to 0.14)  |     | -0.19 (-0.49 to 0.16)  |     | -0.77 (-1.48 to 0.16)  |     |
| Ischemic stroke           | -0.19 (-0.30 to -0.06) | 540 | -0.16 (-0.29 to -0.02) | 623 | -0.28 (-0.63 to 0.12)  |     | -0.83 (-1.70 to 0.50)  |     |
| Incident Cancer           | 0.03 (-0.37 to 0.46)   |     | 0.41 (-0.13 to 1.01)   |     | -0.30 (-0.76 to 0.19)  |     | -0.68 (-2.09 to 0.95)  |     |
| Cancer Mortality          | 0.05 (-0.11 to 0.23)   |     | 0.16 (-0.06 to 0.42)   |     | -0.13 (-0.41 to 0.17)  |     | 0.16 (-0.56 to 1.02)   |     |

  

| Safety                | All patients        |     | Low Risk            |     | High Risk            |     | Diabetes             |     |
|-----------------------|---------------------|-----|---------------------|-----|----------------------|-----|----------------------|-----|
|                       | ARD                 | NNH | ARD                 | NNH | ARD                  | NNH | ARD                  | NNH |
| Major Bleeding        | 0.47 (0.34 to 0.62) | 210 | 0.40 (0.25 to 0.57) | 249 | 0.64 (0.35 to 0.97)  | 152 | 0.80 (0.29 to 1.39)  | 121 |
| Intracranial Bleeding | 0.11 (0.04 to 0.18) | 927 | 0.13 (0.05 to 0.22) | 796 | 0.07 (-0.04 to 0.21) |     | 0.12 (-0.09 to 0.43) |     |
| Major GI Bleeding     | 0.30 (0.20 to 0.41) | 334 | 0.27 (0.15 to 0.40) | 376 | 0.39 (0.16 to 0.69)  | 255 | 0.41 (0.06 to 0.86)  | 243 |

Absolute risk differences (ARDs), Number Needed to Treat (NNT) and Number Needed to Harm (NNH) for included outcomes. Negative ARD values indicate favoring aspirin, positive ARD values indicate favoring no aspirin. NNT and NNH values are reported only for outcomes with a statistically significant ARD.

Formatted Table

**eTable 4: Total stroke outcomes**

|                            | Studies | Aspirin |              | No Aspirin |              | ARR (95% CI)         | HR (95% CrI)         | P  |
|----------------------------|---------|---------|--------------|------------|--------------|----------------------|----------------------|----|
|                            |         | Events  | Participants | Events     | Participants |                      |                      |    |
| All participants           | 12      | 1116    | 73,883       | 1136       | 72,317       | 0.10 (-0.03 to 0.22) | 0.93 (0.86 to 1.02)  | 1  |
| Low risk participants      | 6       | 752     | 56,212       | 788        | 56,354       | 0.04 (-0.15 to 0.20) | 0.95 (0.79 to 1.16)  | 6  |
| High risk participants     | 7       | 381     | 17,671       | 380        | 15,963       | 0.22 (-0.07 to 0.49) | 0.89 (0.77 to 1.03)  | 11 |
| Participants with diabetes | 7       | 128     | 4048         | 156        | 3960         | 0.50 (-0.05 to 0.97) | 0.78 (0.61 to 1.00)* | 13 |

\*Upper confidence interval 1.004

Formatted Table



**eTable 5: Event rates for efficacy and safety outcomes**

| Outcome                   | Events per 10,000 participant-years |            |          |            |           |            |          |            |
|---------------------------|-------------------------------------|------------|----------|------------|-----------|------------|----------|------------|
|                           | All participants                    |            | Low Risk |            | High Risk |            | Diabetes |            |
|                           | Aspirin                             | No aspirin | Aspirin  | No aspirin | Aspirin   | No aspirin | Aspirin  | No aspirin |
| <b>Efficacy</b>           |                                     |            |          |            |           |            |          |            |
| Composite outcome         | 60.2                                | 65.2       | 41.3     | 46.4       | 109.2     | 117.9      | 103.6    | 114.1      |
| All-cause mortality       | 69.4                                | 70.0       | 50.5     | 50.4       | 118.5     | 124.9      | 134.2    | 137.6      |
| Cardiovascular mortality  | 19.1                                | 19.5       | 10.7     | 11.9       | 40.7      | 40.7       | 38.3     | 40.4       |
| All myocardial infarction | 28.1                                | 31.2       | 17.2     | 21.0       | 56.5      | 59.8       | 59.8     | 62.6       |
| Total stroke              | 24.0                                | 25.0       | 19.9     | 20.9       | 41.5      | 44.9       | 59.0     | 74.2       |
| Ischemic stroke           | 18.4                                | 21.4       | 14.7     | 17.1       | 30.8      | 36.9       | 40.3     | 46.7       |
| Cancer incidence          | 105.4                               | 105.5      | 97.7     | 93.8       | 121.8     | 132.4      | 162.7    | 166.2      |
| Cancer mortality          | 31.2                                | 30.1       | 23.8     | 21.6       | 48.8      | 51.9       | 61.9     | 60.9       |
| <b>Safety</b>             |                                     |            |          |            |           |            |          |            |
| Major Bleeding            | 23.1                                | 16.4       | 19.2     | 13.4       | 37.7      | 28.3       | 54.7     | 42.4       |
| Intracranial Bleeding     | 6.7                                 | 5.1        | 6.5      | 4.6        | 7.4       | 6.3        | 10.0     | 8.3        |
| Major GI Bleeding         | 12.9                                | 8.2        | 10.5     | 6.7        | 19.5      | 12.6       | 22.6     | 16.7       |

Trials were deemed low or high risk if the 10-year cardiovascular risk for the primary cardiovascular outcome was less than 10%, or 10% or more respectively. The Women's Health Study did not report the number of patients in the high cardiovascular risk subgroup; this study was therefore excluded from event rate calculations for participants at high risk of the primary outcome.

Formatted Table

**eTable 6: Sensitivity analyses**

| Outcome                   | Sensitivity Analysis                                          |                                                                       |                                                                    |                                                                                          |
|---------------------------|---------------------------------------------------------------|-----------------------------------------------------------------------|--------------------------------------------------------------------|------------------------------------------------------------------------------------------|
|                           | Total daily aspirin dose ≤100mg<br>11 studies;<br>N = 134,470 | Double-blind, placebo-controlled studies<br>9 studies;<br>N = 135,043 | Studies published since the year 2000<br>9 studies;<br>N = 113,140 | Excluding studies enrolling patients with asymptomatic PAD<br>11 studies;<br>N = 156,874 |
| <b>Efficacy</b>           |                                                               |                                                                       |                                                                    |                                                                                          |
| Composite outcome         | 0.89 (0.83 to 0.95)                                           | 0.88 (0.83 to 0.94)                                                   | 0.91 (0.84 to 0.98)                                                | 0.88 (0.83 to 0.93)                                                                      |
| All-cause mortality       | 0.95 (0.87 to 1.03)                                           | 0.96 (0.88 to 1.03)                                                   | 0.94 (0.85 to 1.04)                                                | 0.94 (0.88 to 1.01)                                                                      |
| Cardiovascular mortality  | 0.91 (0.80 to 1.05)                                           | 0.96 (0.84 to 1.09)                                                   | 0.88 (0.73 to 1.06)                                                | 0.92 (0.82 to 1.04)                                                                      |
| All myocardial infarction | 0.87 (0.76 to 1.00)*                                          | 0.84 (0.70 to 1.03)                                                   | 0.94 (0.81 to 1.08)                                                | 0.80 (0.68 to 0.95)                                                                      |
| Total stroke              | 0.90 (0.82 to 0.98)                                           | 0.93 (0.84 to 1.02)                                                   | 0.89 (0.80 to 0.98)                                                | 0.95 (0.87 to 1.03)                                                                      |
| Ischemic stroke           | 0.79 (0.74 to 0.85)                                           | 0.85 (0.69 to 1.06)                                                   | 0.80 (0.74 to 0.86)                                                | 0.81 (0.76 to 0.87)                                                                      |
| <b>Safety</b>             |                                                               |                                                                       |                                                                    |                                                                                          |
| Major bleeding            | 1.43 (1.30 to 1.57)                                           | 1.41 (1.28 to 1.55)                                                   | 1.39 (1.26 to 1.53)                                                | 1.42 (1.30 to 1.56)                                                                      |
| Intracranial bleeding     | 1.31 (1.11 to 1.56)                                           | 1.33 (1.11 to 1.60)                                                   | 1.34 (1.13 to 1.60)                                                | 1.33 (1.13 to 1.57)                                                                      |
| Major GI bleeding         | 1.55 (1.36 to 1.77)                                           | 1.54 (1.35 to 1.76)                                                   | 1.48 (1.28 to 1.71)                                                | 1.57 (1.38 to 1.79)                                                                      |
| <b>Exploratory</b>        |                                                               |                                                                       |                                                                    |                                                                                          |
| Incident cancer           | 1.01 (0.92 to 1.08)                                           | 0.99 (0.89 to 1.06)                                                   | 1.01 (0.91 to 1.10)                                                | 1.02 (0.98 to 1.07)                                                                      |
| Cancer mortality          | 1.04 (0.96 to 1.12)                                           | 1.03 (0.95 to 1.12)                                                   | 1.04 (0.96 to 1.12)                                                | 1.05 (0.97 to 1.13)                                                                      |

Sensitivity analyses for all efficacy, safety and exploratory outcomes. Data presented as Hazard Ratio (95% CrI). N denotes the number of participants included in each analysis. GI – gastrointestinal; PAD – peripheral arterial disease. \*Upper confidence interval 0.9989.

Formatted Table

**eFigure 1: Study Flow Chart**

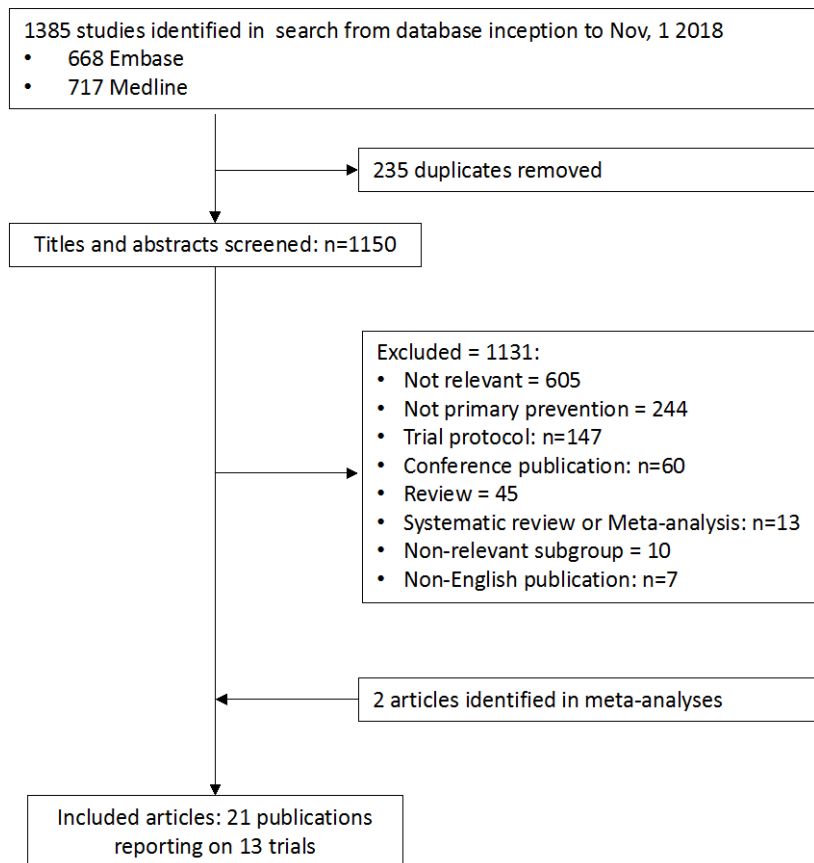

**eFigure 2: Risk of bias summary**

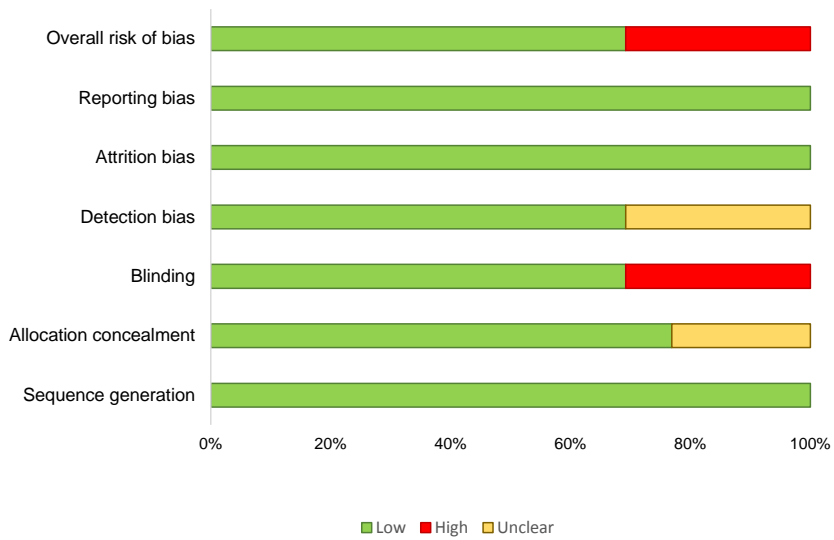

**eFigure 3: Funnel plot for primary cardiovascular outcome**

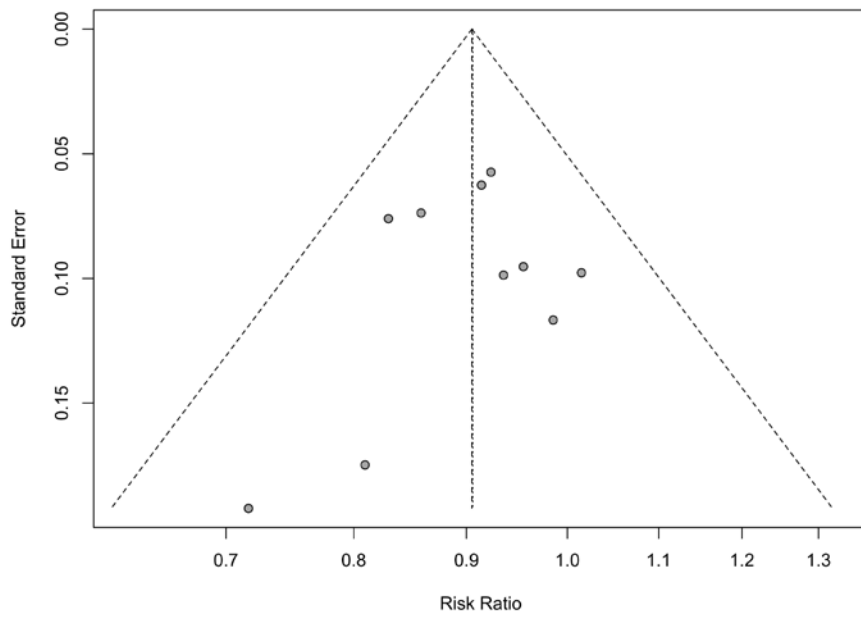

Egger Test: -0.47 (standard error: 0.77);  $t = -0.59$ ,  $P = 0.57$ .

eFigure 4: Frequentist analysis forest plots

Composite outcome

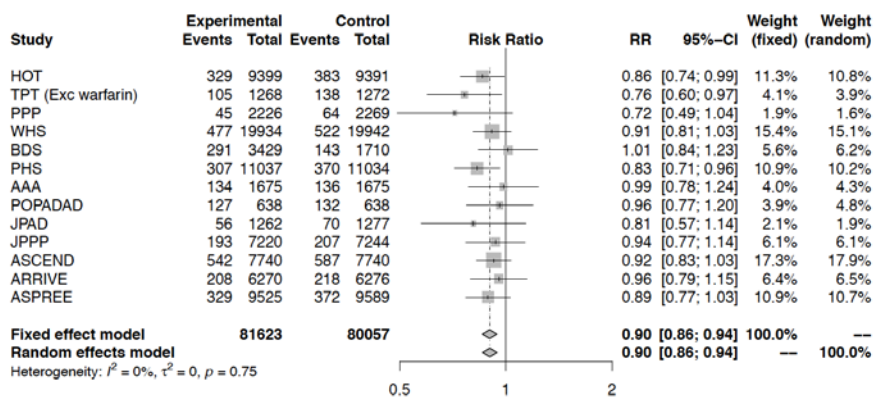

All-cause mortality

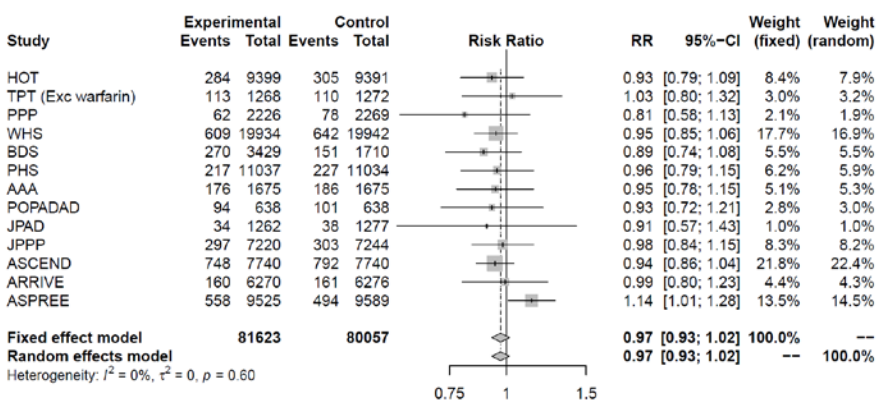

eFigure 4: Frequentist analysis forest plots (Continued)

Cardiovascular mortality

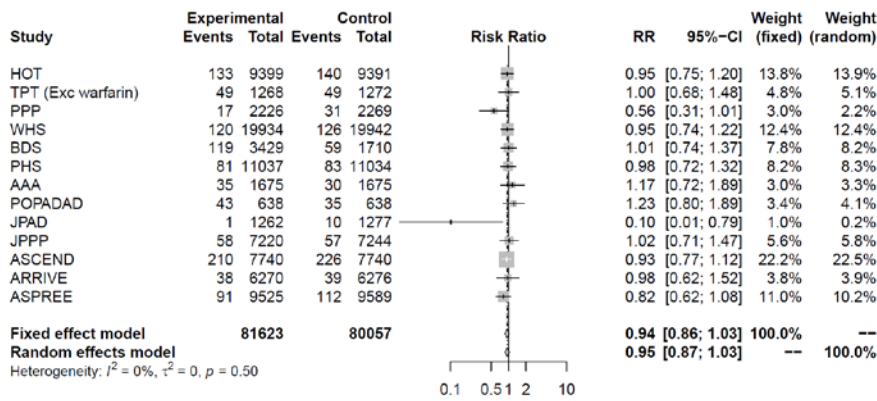

All myocardial infarction

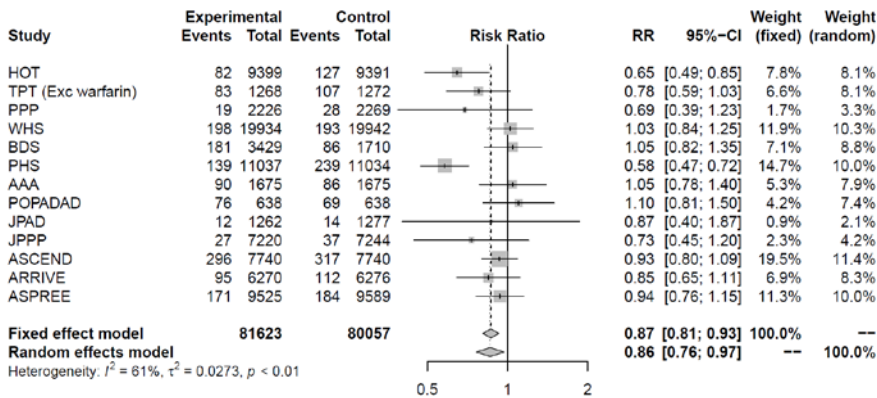

eFigure 4: Frequentist analysis forest plots (Continued)

**Total stroke**

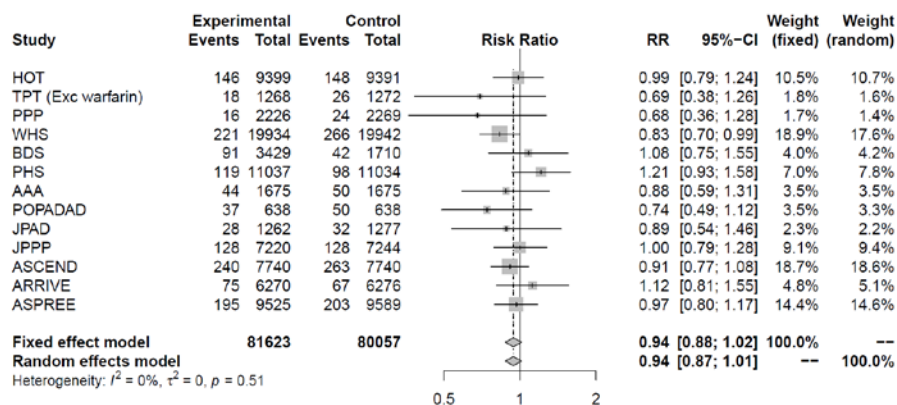

**Ischemic stroke**

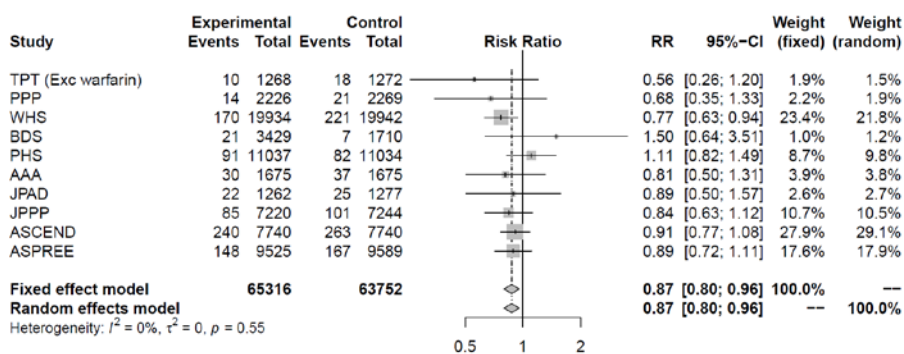

**Incident Cancer**

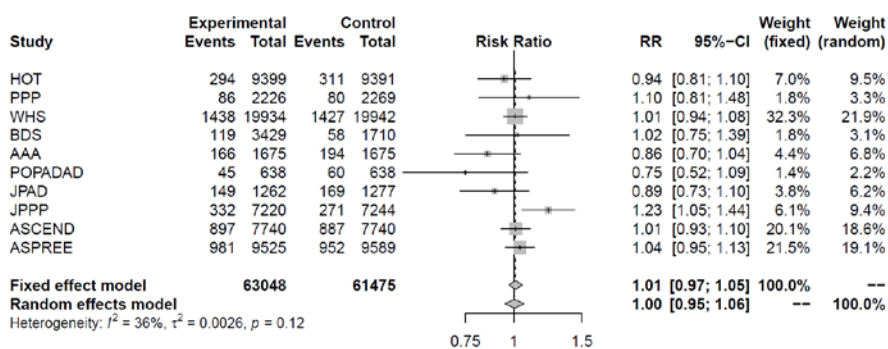



eFigure 4: Frequentist analysis forest plots (Continued)

**Cancer Mortality**

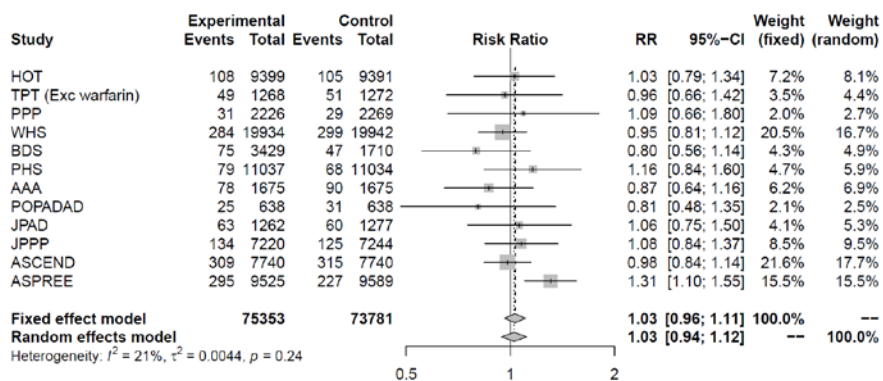

**Major bleeding**

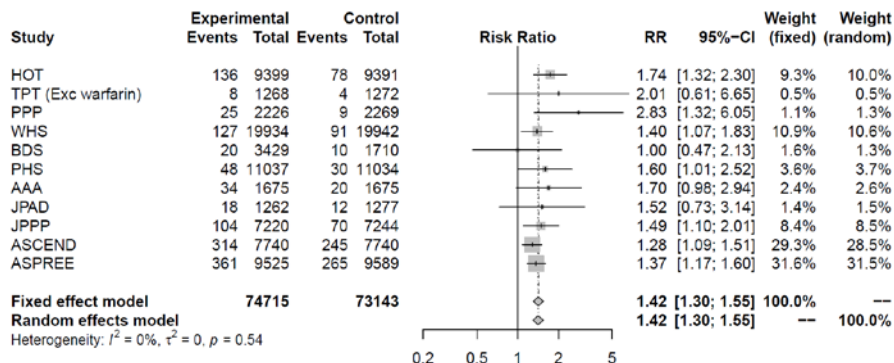

**Intracranial bleeding**

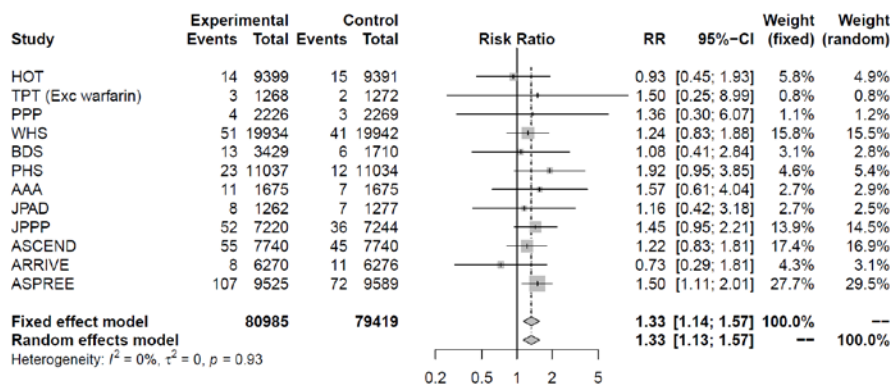

**eFigure 4: Frequentist analysis forest plots (Continued)**  
**Major gastrointestinal bleeding**

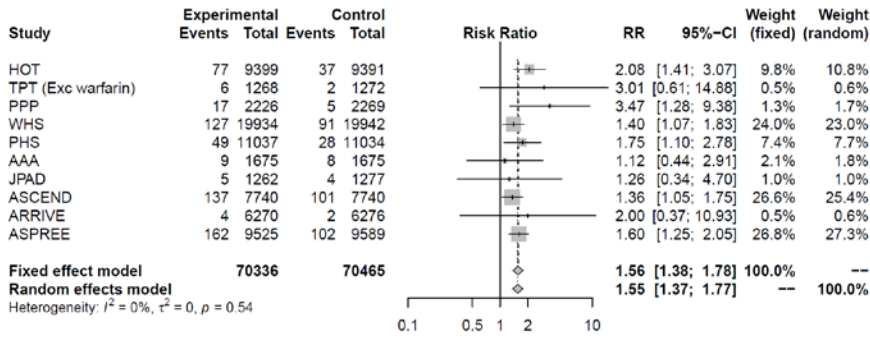

Frequentist pairwise meta-analysis forest plots.

Experimental indicates treatment with aspirin, while Control denotes no aspirin. RR – risk ratio; CI – confidence interval.

Study acronyms: AAA – Aspirin for Asymptomatic Atherosclerosis<sup>17</sup>; ARRIVE – Aspirin to Reduce Risk of Initial Vascular Events<sup>20</sup>; ASCEND – A Study of Cardiovascular Events in Diabetes<sup>19</sup>; ASPREE – Aspirin in Reducing Events in the Elderly<sup>21</sup>; BDS – British Doctor's Study<sup>9</sup>; HOT – Hypertension Optimal Treatment<sup>11</sup>; JPAD – Japanese Primary Prevention of Atherosclerosis with Aspirin for Diabetes<sup>16</sup>; JPPP – Japanese Primary Prevention Project<sup>18</sup>; PHS – Physician's Health Study<sup>10</sup>; POPADAD – Prevention of Progression of Arterial Disease and Diabetes<sup>15</sup>; PPP – Primary Prevention Project<sup>13</sup>; TPT – Thrombosis Prevention Trial<sup>12</sup>; WHS – Women's Health Study<sup>14</sup>.

## Supplemental references

1. van Valkenhoef G, Kuiper J. Network Meta-Analysis Using Bayesian Methods. R package version 0.8-2. . 2016; <https://CRAN.R-project.org/package=gemtc>.
2. *R: A language and environment for statistical computing* [computer program]. R Foundation for Statistical Computing, Vienna, Austria; 2008.
3. Plummer M. JAGS: a program for analysis of Bayesian graphical models using Gibbs sampling. *Proceedings of the 3rd International Workshop on Distributed Statistical Computing (DSC 2003)*. 2003.
4. Schwarzer G. meta: An R package for meta-analysis. *R News*. 2007;7(3):40-45.
5. Dias S, Sutton AJ, Ades AE, Welton NJ. Evidence synthesis for decision making 2: a generalized linear modeling framework for pairwise and network meta-analysis of randomized controlled trials. *Medical decision making : an international journal of the Society for Medical Decision Making*. 2013;33(5):607-617.
6. Brooks SP, Gelman A. General methods for monitoring convergence of iterative simulations. *Journal of Computational and Graphical Statistics*. 1998;7:434-455.
7. Zheng SL, Roddick AJ, Aghar-Jaffar R, et al. Association between use of sodium-glucose cotransporter 2 inhibitors, glucagon-like peptide 1 agonists, and dipeptidyl peptidase 4 inhibitors with all-cause mortality in patients with type 2 diabetes: A systematic review and meta-analysis. *JAMA*. 2018;319(15):1580-1591.
8. Dias S, Sutton AJ, Welton NJ, Ades AE. Evidence Synthesis for Decision Making 3: Heterogeneity—Subgroups, Meta-Regression, Bias, and Bias-Adjustment. *Medical Decision Making*. 2013;33(5):618-640.
9. Peto R, Gray R, Collins R, et al. Randomised trial of prophylactic daily aspirin in British male doctors. *Br Med J (Clin Res Ed)*. 1988;296(6618):313-316.
10. Final report on the aspirin component of the ongoing Physician's Health Study. *N Engl J Med*. 1989;321(3):129-135.

11. Hansson L, Zanchetti A, Carruthers SG, et al. Effects of intensive blood-pressure lowering and low-dose aspirin in patients with hypertension: principal results of the Hypertension Optimal Treatment (HOT) randomised trial. HOT Study Group. *Lancet (London, England)*. 1998;351(9118):1755-1762.
12. Thrombosis prevention trial: randomised trial of low-intensity oral anticoagulation with warfarin and low-dose aspirin in the primary prevention of ischaemic heart disease in men at increased risk. The Medical Research Council's General Practice Research Framework. *Lancet (London, England)*. 1998;351(9098):233-241.
13. de Gaetano G. Low-dose aspirin and vitamin E in people at cardiovascular risk: a randomised trial in general practice. Collaborative Group of the Primary Prevention Project. *Lancet (London, England)*. 2001;357(9250):89-95.
14. Ridker PM, Cook NR, Lee I-M, et al. A randomized trial of low-dose aspirin in the primary prevention of cardiovascular disease in women. *N Engl J Med*. 2005;352(13):1293-1304.
15. Belch J, MacCuish A, Campbell I, et al. The prevention of progression of arterial disease and diabetes (POPADAD) trial: factorial randomised placebo controlled trial of aspirin and antioxidants in patients with diabetes and asymptomatic peripheral arterial disease. *BMJ*. 2008;337:a1840.
16. Ogawa H, Nakayama M, Morimoto T, et al. Low-dose aspirin for primary prevention of atherosclerotic events in patients with type 2 diabetes: a randomized controlled trial. *JAMA*. Vol 3002008:2134-2141.
17. Fowkes FGR, Price JF, Stewart MCW, et al. Aspirin for prevention of cardiovascular events in a general population screened for a low ankle brachial index: a randomized controlled trial. *JAMA*. 2010;303(9):841-848.
18. Ikeda Y, Shimada K, Teramoto T, et al. Low-dose aspirin for primary prevention of cardiovascular events in Japanese patients 60 years or older with atherosclerotic risk factors: a randomized clinical trial. *JAMA*. 2014;312(23):2510-2520.

19. Effects of Aspirin for Primary Prevention in Persons with Diabetes Mellitus. *N Engl J Med*. 2018.
20. Gaziano JM, Brotans C, Coppolecchia R, et al. Use of aspirin to reduce risk of initial vascular events in patients at moderate risk of cardiovascular disease (ARRIVE): a randomised, double-blind, placebo-controlled trial. *Lancet (London, England)*. 2018.
21. McNeil JJ, Nelson MR, Woods RL, et al. Effect of Aspirin on All-Cause Mortality in the Healthy Elderly. *New England Journal of Medicine*. 2018.
